# Supplementary material for: Differential Serum Cytokine Profiles in Patients with Chronic Hepatitis B, C, and Hepatocellular Carcinoma
Source: PubMed Central journal article supplement (PMC5605527; doi:10.1038/s41598-017-11975-7), 2017-09-19
Supplement: 41598_2017_11975_MOESM1_ESM.pdf [file 41598_2017_11975_MOESM1_ESM.pdf]

## Supplementary Information

### Differential Serum Cytokine Profiles in Patients with Chronic Hepatitis B, C, and Hepatocellular Carcinoma

Jacqueline Estevez<sup>1,2</sup>, Vincent L. Chen<sup>3,4</sup>, Ondrej Podlaha<sup>5</sup>, Biao Li<sup>5</sup>, An Le<sup>1</sup>, Philip Vutien<sup>1,6</sup>,  
Ellen T. Chang<sup>7</sup>, Yael Rosenberg-Hasson<sup>8</sup>, Zhaoshi Jiang<sup>5</sup>, Stefan Pflanz<sup>5</sup>, Dongliang Ge<sup>5</sup>, Anuj  
Gaggar<sup>5</sup>, and Mindie H. Nguyen<sup>1</sup>

<sup>1</sup>Stanford University Medical Center, Division of Gastroenterology and Hepatology, Stanford,  
CA 94305, USA

<sup>2</sup>Boston University School of Medicine, Boston, MA 02118, USA

<sup>3</sup>Stanford University Medical Center, Department of Medicine, Stanford, CA 94305, USA

<sup>4</sup>University of Michigan, Division of Gastroenterology and Hepatology, Ann Arbor, MI, USA

<sup>5</sup>Gilead Sciences, Foster City, CA 94404, USA

<sup>6</sup>Rush University Medical Center, Chicago, IL 60612, USA

<sup>7</sup>Stanford University School of Medicine, Department of Health Research and Policy  
(Epidemiology), Stanford, CA 94305, USA

<sup>8</sup>Stanford University Medical Center, The Human Immune Monitoring Center, Stanford, CA  
94305, USA

**Top predictive biomarkers for serum cytokine profiles of non-hepatocellular carcinoma patients with chronic hepatitis B vs. chronic hepatitis C**

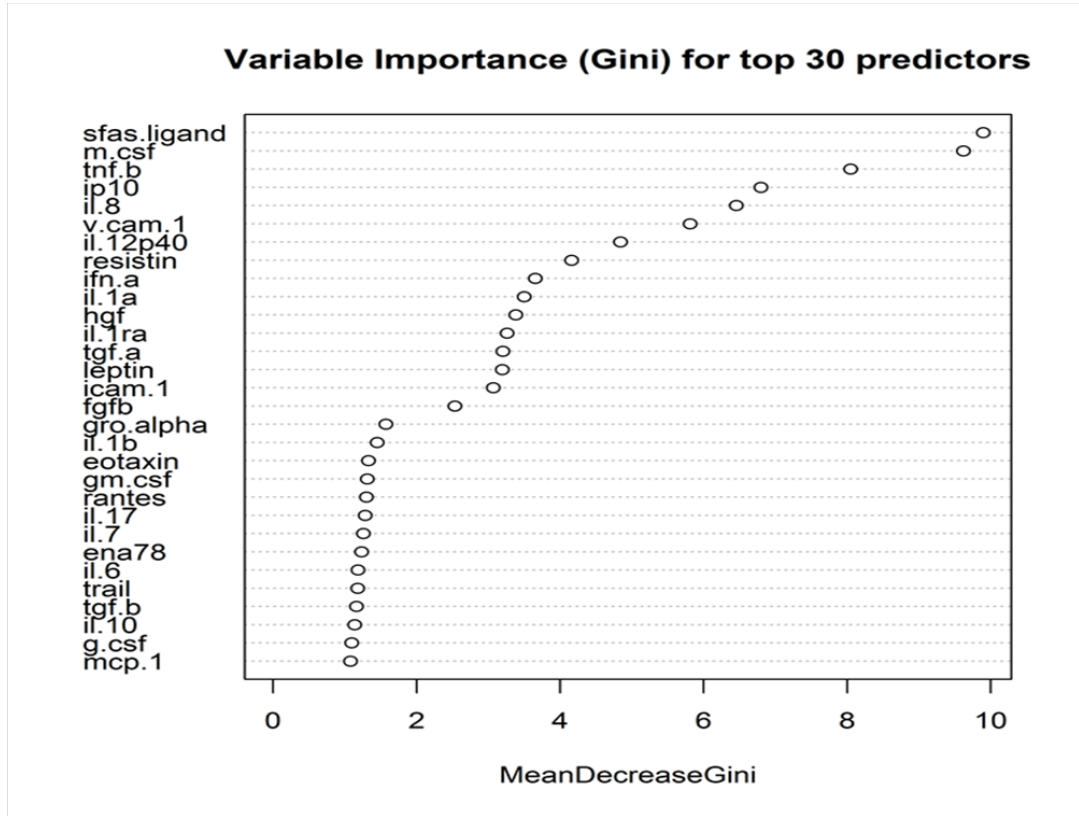

**Supplemental Figure S1. Gini graph of top predictive cytokines and chemokines of non-hepatocellular carcinoma patients with chronic hepatitis B vs. chronic hepatitis C.**

**Serum cytokine profiles of non-hepatocellular carcinoma Asian patients with chronic hepatitis B vs. chronic hepatitis C**

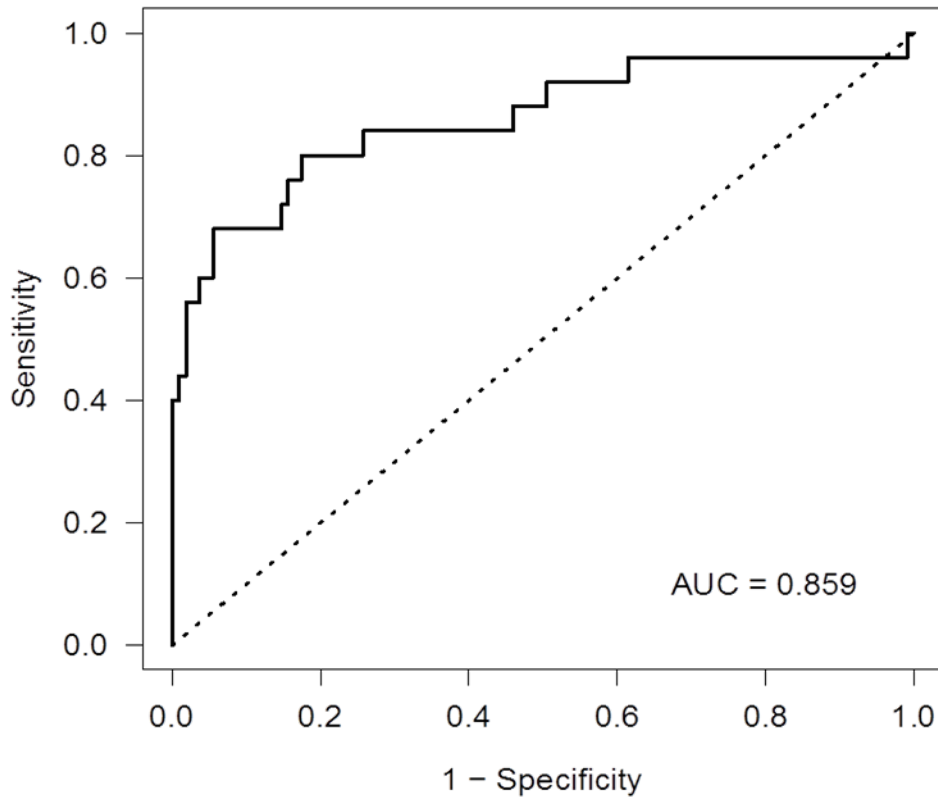

**Supplemental Figure S2. Receiver operating characteristic plot with area under the curve (AUC) comparing serum cytokine and chemokine profiles of Asian patients without hepatocellular carcinoma with chronic hepatitis B vs. chronic hepatitis C.**

**Serum cytokine profiles of non-hepatocellular carcinoma patients with chronic hepatitis B vs. non-viral hepatitis**

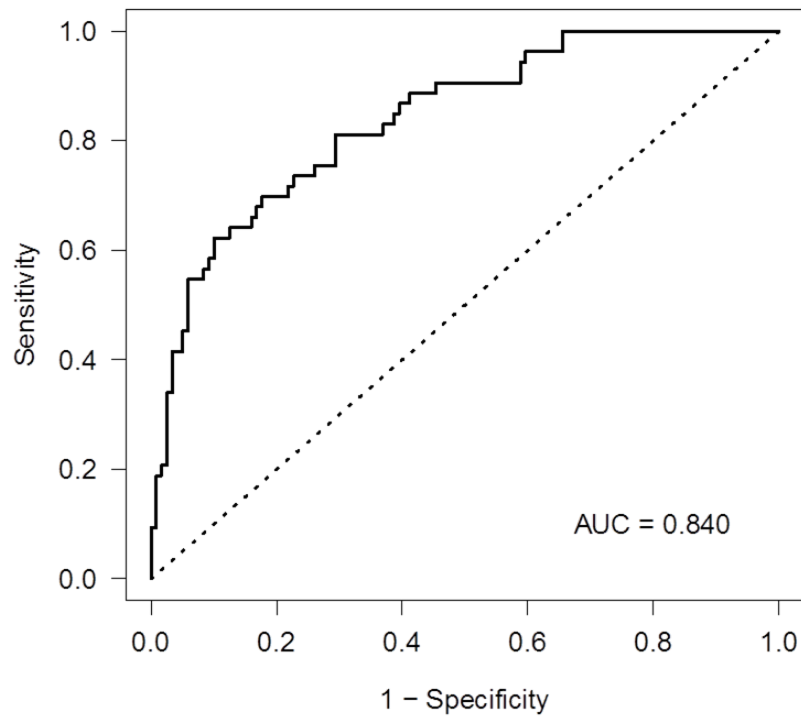

**Supplemental Figure S3. Receiver operating characteristic plot with area under the curve (AUC) comparing serum cytokine and chemokine profiles of patients without hepatocellular carcinoma with chronic hepatitis B vs. non-viral hepatitis.**

**Serum cytokine profiles of non-hepatocellular carcinoma patients with chronic hepatitis C vs. non-viral hepatitis**

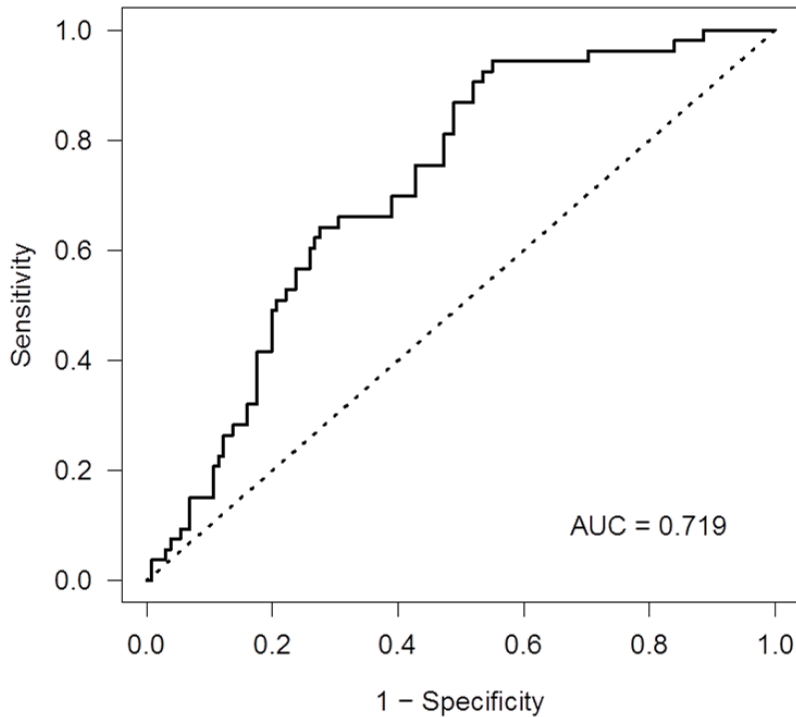

**Supplemental Figure S4. Receiver operating characteristic plot with area under the curve (AUC) comparing serum cytokine and chemokine profiles of patients without hepatocellular carcinoma with chronic hepatitis C vs. non-viral hepatitis.**

**Top predictive biomarkers for serum cytokine profiles of hepatocellular carcinoma patients with chronic hepatitis B vs. chronic hepatitis C**

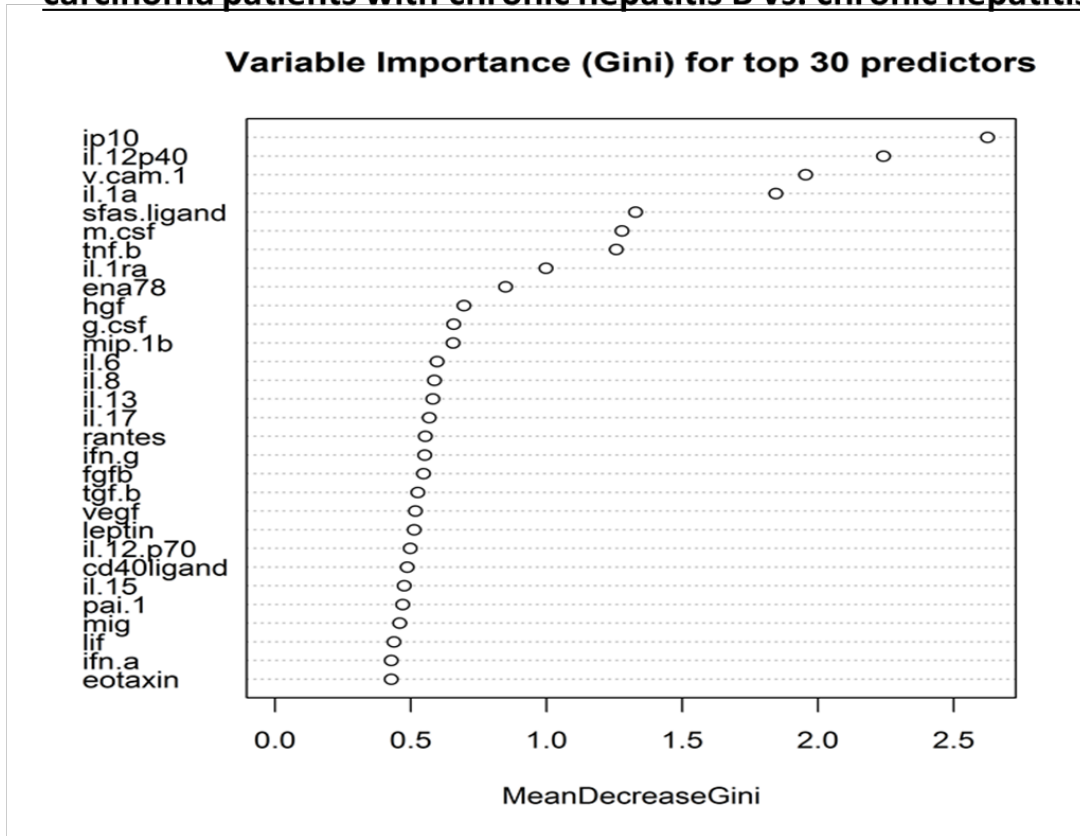

**Supplemental Figure S5. Gini graph for top predictive cytokines and chemokines of hepatocellular carcinoma patients with chronic hepatitis B vs. chronic hepatitis C.**

**Serum cytokine profiles of chronic hepatitis B patients with vs. without hepatocellular carcinoma**

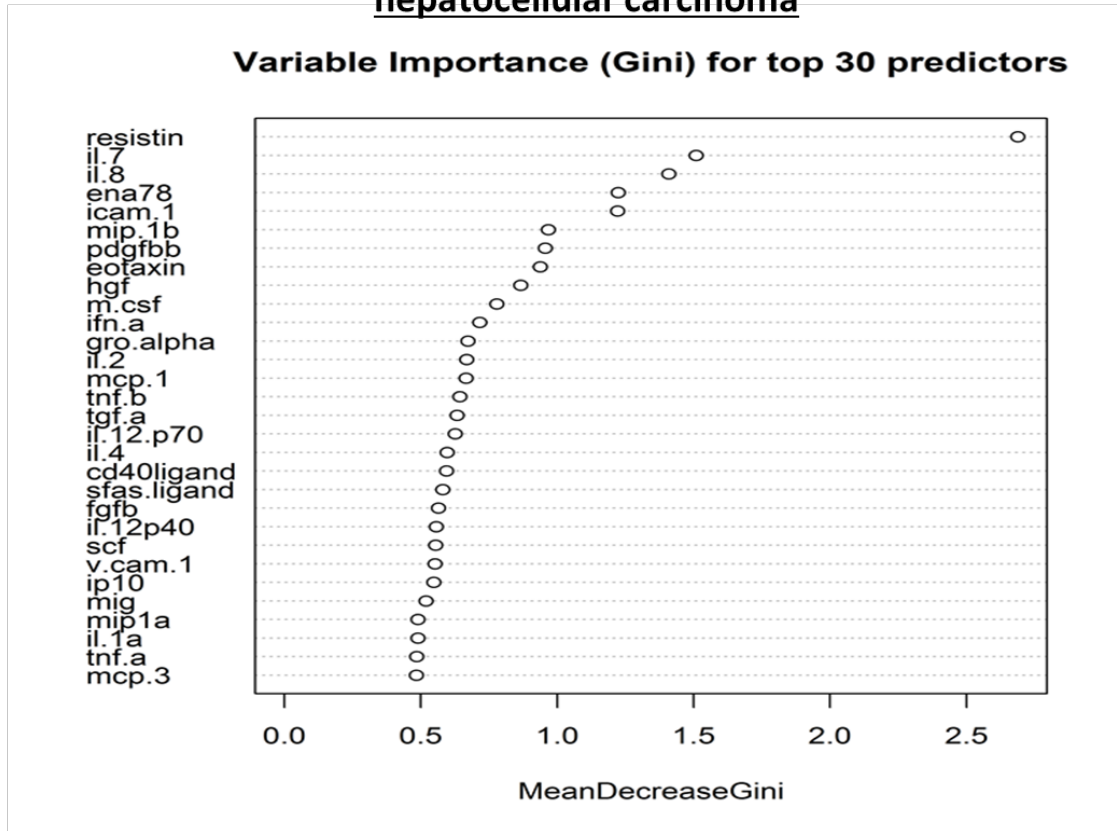

**Supplemental Figure S6. Gini graph for top predictive cytokines and chemokines of chronic hepatitis B patients with vs. without hepatocellular carcinoma.**

**Serum cytokine profiles of cirrhotic chronic hepatitis B patients with hepatocellular carcinoma vs. no hepatocellular carcinoma**

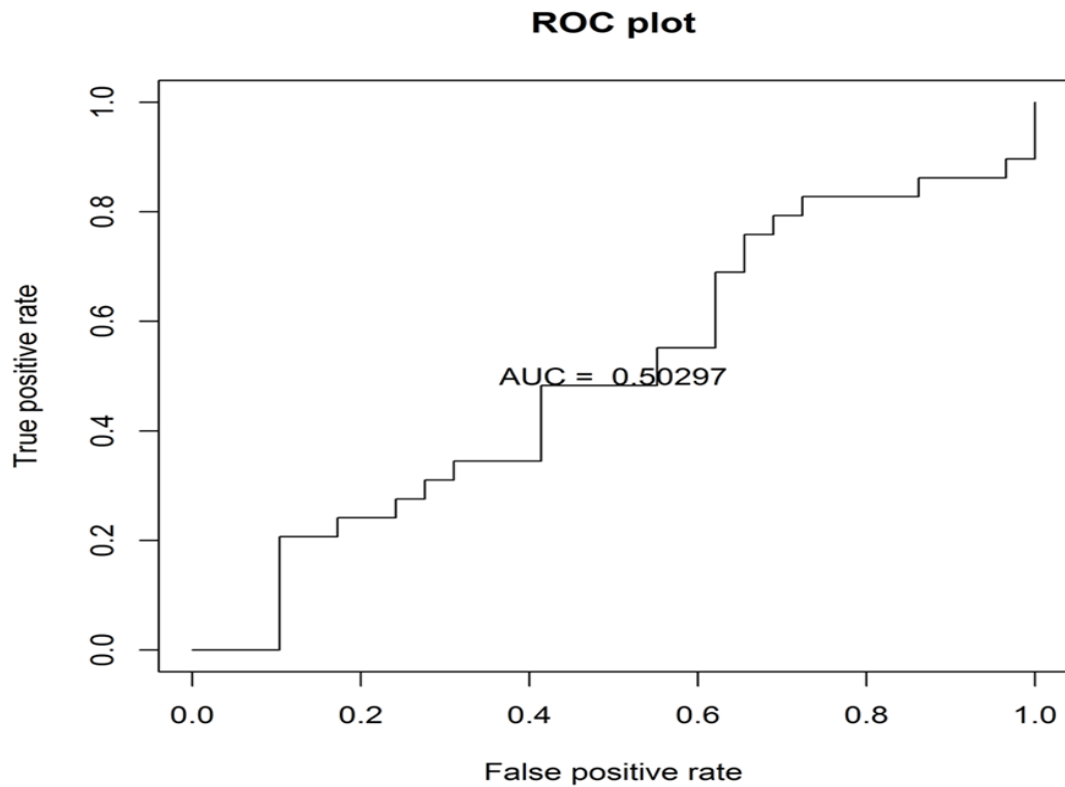

**Supplemental Figure S7. Receiver operating characteristic plot with area under the curve (AUC) comparing serum cytokine and chemokine profiles of cirrhotic chronic hepatitis B patients with hepatocellular carcinoma vs. without hepatocellular carcinoma.**



**Serum cytokine profiles of chronic hepatitis C patients with vs. without hepatocellular carcinoma**

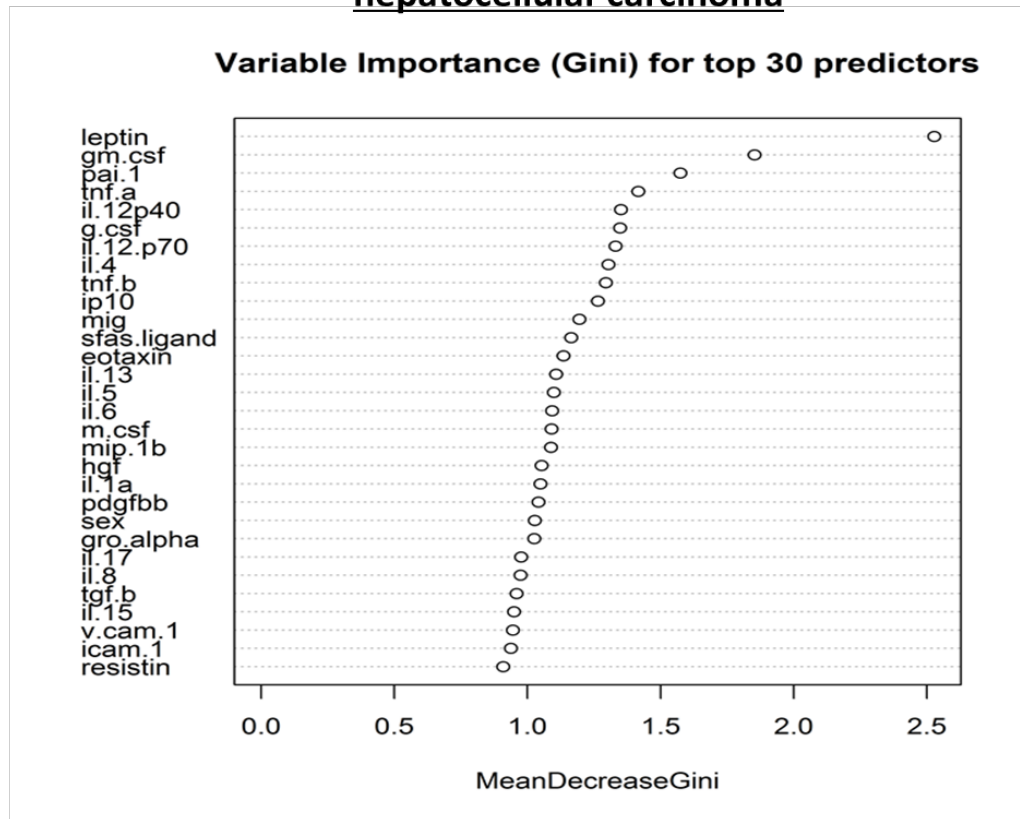

**Supplemental Figure S8. Gini graph for top predictive cytokines and chemokines of chronic hepatitis C patients with vs. without hepatocellular carcinoma.**
